# Supplementary material
Source: publisher figshare collection journal article supplement (https://tandf.figshare.com/ndownloader/files/13152431)
Supplement: Supplementary file 1 [file 13152431]

Structure Elucidation Capabilities on Typical Pharmaceutical Drugs by New Nuclear Magnetic Resonance (NMR) Technology: a 400 MHz High-Temperature Superconducting (HTS) Power-Driven Magnet NMR System

Maria Victoria Silva Elipe,1* Neil Donovan,2 Robert Krull,2 Donald Pooke,3 and

Kimberly L. Colson2

1Department of Attribute Sciences, Amgen Inc., One Amgen Center Drive, Thousand Oaks, CA 91320-1799

2Bruker BioSpin, 15 Fortune Drive, Billerica, MA 01821

3HTS-110, 1B Quadrant Drive, Lower Hutt, New Zealand

**Supplemental Section**

**NMR**

The cinacalcet HCl sample (around 20 mg) was dissolved in 550 μL of CD3OD and transferred to a 5 mm NMR tube. Compounds I and II (around 20 mg each) were prepared in similar manner but dissolved individually in DMSO-*d6* instead. NMR tubes used were 5 mm Norell Economy NMR Tubes part number ST500-7 (Morganton, NC, USA) and 5 mm New Era Enterprises NMR tubes part number NE-HL5-7 (Vineland NJ, USA).

The sample temperature was maintained at 300 K or 305 K. The data processing was performed with spectrometer software (TopSpin 3.5.7, Bruker BioSpin, Billerica, MA) and Mnova software (Mnova version 12, Mestrelab Research, SL, Santiago de Compostela, Spain). Chemical shifts are reported in the δ scale (ppm) by referencing the residual solvent peaks of CHD2OD to 3.31 ppm and 49.15 ppm for 1H and 13C, respectively, and by referencing the residual solvent peaks of CHD2SOCD3 to 2.50 ppm and 39.51 ppm for 1H and 13C, respectively. Gradients were used for 1D 1H TOCSY, 1D 1H NOE, 2D 1H-COSY, 2D 1H-NOESY, 2D 1H, 13C-HSQC, and 2D 1H, 13C HMBC experiments. Gradient strengths for the 2D 1H-COSY experiments were set at 20%. The mixing time for 2D 1H-NOESY was 300 ms. The mixing time for 1D 1H -TOCSY was varied from 40 ms to 120 ms. The 2D 1H,13C-HSQC experiment utilized 145 Hz for one bond 1H-13C coupling. The 2D 1H,13C-HMBC utilized 145 Hz for one bond 1H-13C coupling for the low-pass filter, and 8 Hz for the two-to-three bond 1H-13C long-range coupling. Number of scans for the 1D 1H, 2D COSY, 2D NOESY, 2D HSQC and 2D HMBC were 16, 4, 8, 4, and 4, respectively. Standard 1D 13C NMR experiment was acquired with power-gated decoupling and 10k scans to view all the carbon signals coupled to fluorine well beyond the noise. Below are additional figures not presented in the main manuscript. The figures below were acquired with the BBFO and BOSS3 shims unless otherwise indicated when using the QNP probe with BOSS1 shims. The figures with the proton, carbon, and fluorine assignments were acquired with the BBFO and BOSS3 shims.

1D 1H NMR spectrum of cinacalcet HCl in CD3OD with assignments.

2D 1H, 1H-COSY NMR spectrum of cinacalcet HCl in CD3OD with assignments.

2D 1H, 1H-NOESY NMR spectrum of cinacalcet HCl in CD3OD with assignments.

1D 13C NMR spectrum of cinacalcet HCl in CD3OD with assignments.

Aromatic region of the 1D 13C NMR spectrum of cinacalcet HCl in CD3OD with assignments.

2D 1H, 13C-HSQC NMR spectrum of cinacalcet in CD3OD with assignments.

2D 1H, 13C-HMBC NMR spectrum of cinacalcet HCl (cinacalcet HCl) in CD3OD with assignments.

1D 19F NMR spectrum of cinacalcet HCl in CD3OD with assignments.

1D 1H NMR spectrum of compound I as sorbic salt complex in DMSO-*d6* with assignments.

2D 1H, 1H-COSY spectrum of compound I as sorbic salt complex in DMSO-*d6* with assignments.

2D 1H, 1H-NOESY spectrum of compound I as sorbic salt complex in DMSO-*d6* with assignments.

1D 13C NMR spectrum of compound I as sorbic salt complex in DMSO-*d6* with assignments.

Aromatic region of the 1D 13C NMR spectrum of compound I as sorbic salt complex in DMSO-*d6* with assignments.

2D 1H, 13C-HSQC spectrum of compound I as sorbic salt complex in DMSO-*d6* with assignments.

2D 1H, 13C-HMBC spectrum of compound I as sorbic salt complex in DMSO-*d6* with assignments.

1D 19F NMR spectrum of compound I as sorbic salt complex in DMSO-*d6* with assignments.

1D 1H NMR spectrum of compound II as sodium salt in DMSO-*d6* with assignments.

1D 1H NMR (bottom) and 1D 1H TOCSY (top) spectra of compound II as sodium salt irradiating at 4.01 ppm (H-21) in DMSO-*d6*.

2D 1H, 1H-COSY spectrum of compound II as sodium salt in DMSO-*d6* with assignments.

2D 1H, 1H-NOESY spectrum of compound II as sodium salt in DMSO-*d6* with assignments.

1D 13C NMR spectrum of compound II as sodium salt in DMSO-*d6* with assignments.

Aromatic region of the 1D 13C NMR spectrum of compound II as sodium salt in DMSO-*d6* with assignments.

2D 1H, 13C-HSQC spectrum of compound II as sodium salt in DMSO-*d6* with assignments.

2D 1H, 13C-HMBC spectrum of compound II as sodium salt in DMSO-*d6* with assignments.

1D 19F NMR spectrum of compound II as sodium salt in DMSO-*d6* with assignments.


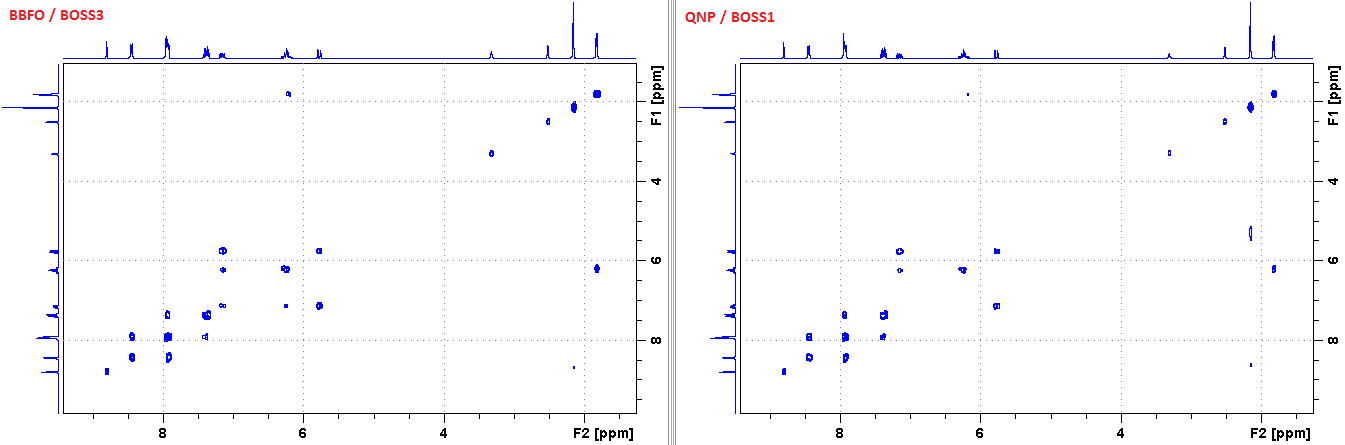


2D 1H COSY spectrum of compound I sorbic acid complex using the BBFO probe with the BOSS3 shimstack and the QNP probe with the BOSS1 shimstack.


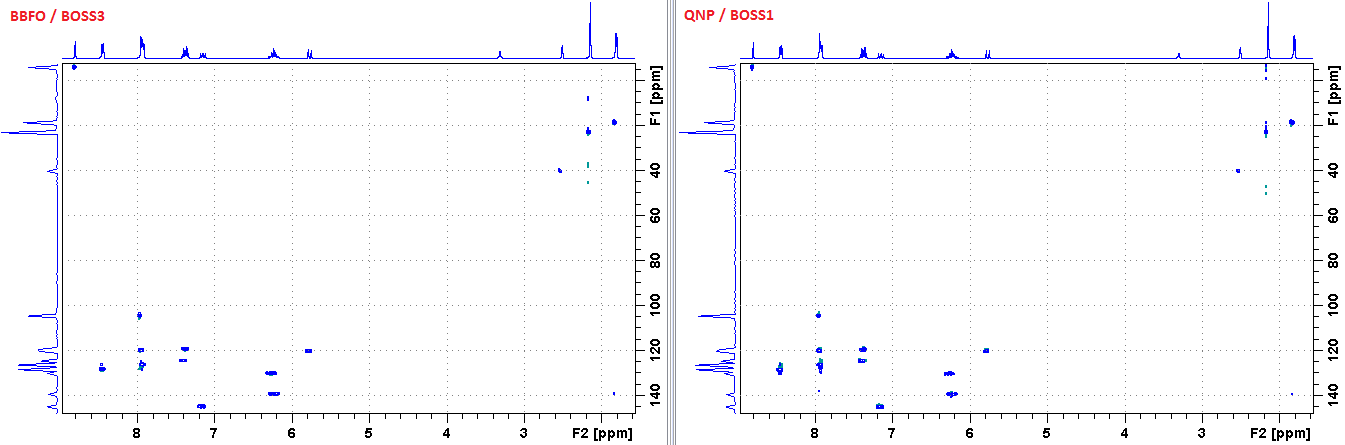
2D 1H, 13C-HSQC spectrum of compound I sorbic acid complex using the BBFO probe with the BOSS3 shimstack and the QNP probe with the BOSS1 shimstack.


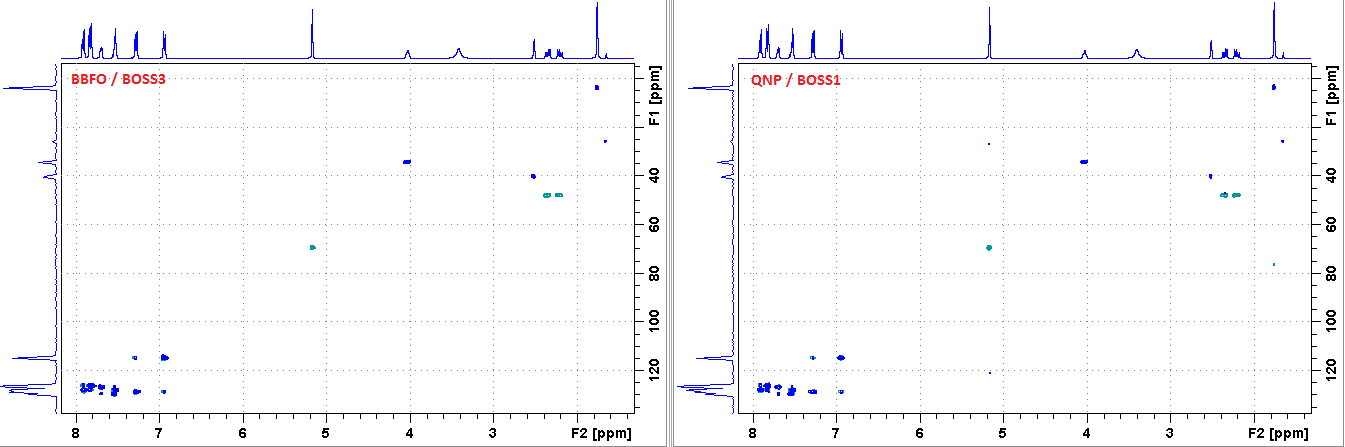


2D 1H, 13C-HSQC spectrum of compound II sodium salt using the BBFO probe with the BOSS3 shimstack and the QNP probe with the BOSS1 shimstack.
